# Supplementary material for: AtHMA4 Drives Natural Variation in Leaf Zn Concentration of Arabidopsis thaliana
Source: Front Plant Sci. 2018 Mar 1;9:270. doi: 10.3389/fpls.2018.00270 (PMC5839161; doi:10.3389/fpls.2018.00270)
Supplement: TABLE S1 — The primers used in this study. [file Table_1.XLSX]

## Sheet: Sheet1
Prime name	Primer sequence (5’-3’)	Purpose
HMA4G1L	AACGCACCAATGTCGTCTAC	HMA4 sequencing
HMA4G1U	TTTTGCGATCAAGATACCAC
HMA4G2L	TTTGTTTCCGGTTCCTATCTTC	HMA4 sequencing
HMA4G2U	AGCCGCATACGTCTTTACTC
HMA4G3L	TGAAAACACGAGAAATGCAAG	HMA4 sequencing
HMA4G3U	AAACTGCCGTATTTGTTATGAGC
HMA4G4L	TGGAAGGGAGAGATGAGGAG	HMA4 sequencing
HMA4G4U	TTTATCTGATCGCACCAAACC
HMA4G5L	TTTGGTTACACACGTATCATGC	HMA4 sequencing
HMA4G5U	CTTCGATGTTCTCGGAATCTG
HMA4G6L	GGCCTTTTAATGGAAGCAAAG	HMA4 sequencing
HMA4G6U	CCAAAGATTGTGAATAAGGTTCG
HMA4G7L	TTCCCGTATTTTGAAATGCAC	HMA4 sequencing
HMA4G7U	AGCAAACGTGAGGGTAAACG
HMA4G8L	TGAAGAAATTGGATCATTATCAG	HMA4 sequencing
HMA4G8U	CGTGTAGCAGTTTGATATGTTTG
HMA4G9L	AGCTTAGCCATTTTCGCAAC	HMA4 sequencing
HMA4G9U	CCATACAAAGTCATGTGAATCC
HMA4G10L	GAACAACCAGCTCGAGAAGC	HMA4 sequencing
HMA4G10U	GAAAACCTTAACGGGCGAAG
HMA4G11L	CTCTCGCAGCAGCAACATAC	HMA4 sequencing
HMA4G11U	ATCCAATGGCAGCAACAATC
HMA4G12L	TCATGGCAGCTTTGTTTCAC	HMA4 sequencing
HMA4G12U	GCTAGCGAGAAGAGCACGAC
HMA4G13L	CTCCAGCTACTTGGGAAACG	HMA4 sequencing
HMA4G13U	TAACGCATGTGGAGATCGAG
HMA4-F-EcoRⅠ	gaattcGTATTCTATTGTTCACCCGCACTATG	PCR of HMA4
HMA4-R-BamHⅠ	ggatccTCGGCATTCACGGAATGAGACTAAAC
HMA4-qRT-F	CCAAATTGCTAAGGCACTAAACG	qRT-PCR of HMA4
HMA4-qRT-R	GGGCTCGGCCATTTGTTC
HMA4-BSA-F	CGCATGATACGTGTGTAACCA	BSA analysis
HMA4-BSA-R	GTGCCTTAGCTGCAACACAA
