# Supplementary material for: AtHMA4 Drives Natural Variation in Leaf Zn Concentration of Arabidopsis thaliana
Source: Front Plant Sci. 2018 Mar 1;9:270. doi: 10.3389/fpls.2018.00270 (PMC5839161; doi:10.3389/fpls.2018.00270)
Supplement: TABLE S2 — The Zn contents of 349 A. thaliana accessions. [file Table_2.XLSX]

## Sheet: Table S2-The Zn content of acce
Line	Leaf Zn Content (mg kg-1 dry weight)
CS28587	131.489
Na.1	205.379
CS28419	167.869
CS28064	119.286
App1.16	110.842
T..D.01	79.5081
CS28350	107.045
Bur.0	132.964
CS28049	125.077
In.0	114.194
CS28108	120.839
Lis.1	102.359
Hs.0	131.725
CIBC.17	121.82
CS28252	120.989
Pro.0	121.711
Kas.2	133.727
Blh.1	113.294
Sha	84.2982
Br.0	135.421
CS28141	111.891
MNF.Pot.68	162.594
Edi.0	97.9181
TOU.H.13	120.607
Bay.0	95.738
DraIV.6.16	131.326
Zdr.6	134.685
Mrk.0	102.322
Bla.1	137.583
CS28814	119.306
Dra3.1	116.747
HSm	159.514
X.M.2.1	126.148
Bor.1	127.765
CS28014	105.659
TOU.I.2	105.5
UKSE06.349	141.033
N13	110.606
CS28326	150.555
TOU.A1.67	112.415
CS28420	101.587
Mt.0	149.59
Ra.0	110.463
Ct.1	137.742
LL.0	128.333
CS28663	124.537
CS28382	132.571
TDr.1	121.232
CS28091	127.826
PAR.5	161.287
CS28099	130.804
X328PNA054	117.455
Lund	127.232
CS28734	103.813
CS28140	136.221
Tomegap.2	156.081
CS28364	169.371
Lz.0	131.748
Oy.0	100.894
CS28394	109.831
CS28636	144.53
Ull2.3	97.5814
MNF.Che.2	122.04
DraIV.1.5	133.252
T620	122.901
Ws.0	134.017
UKSE06.351	118.747
TOU.J.3	136.315
CS28633	96.6211
Kelsterbach.4	125.573
CS28495	118.742
Bor.4	124.361
ALL1.2	146.158
Bu.0	129.626
DraIV.6.35	157.982
Got.7	127.24
CS28795	108
Lp2.2	99.0828
UKNW06.386	151.431
ZdrI.2.24	138.419
TOU.I.6	112.246
CS28163	125.171
CS28804	111.44
Br.1.6	137.331
CS28274	142.072
CS28202	145.655
Ta.0	114.962
CS28332	99.0589
CS28739	134.059
Nd.1	145.225
UKID37	130.625
CS28158	129.149
Kno.18	120.155
CS28243	144.424
CS28395	254.527
TOU.A1.96	126.519
CS28461	88.6697
MOG.37	115.184
CS28280	103.077
Rak.2	93.8878
CS28620	125.066
CS28568	136.764
CS28583	102.067
TDr.17	100.792
CS28200	124.632
Hi.0	139.055
TOU.A1.116	128.93
CS28142	128.498
Est.1	107.027
Ren.1	120.656
Gd.1	132.616
Belmonte.4.94	109.853
CS28459	118.657
Duk	117.72
CS28810	119.309
CS28279	115.479
Lom1.1	123.264
Bg.2	119.909
Liarum	104.269
CS28823	101.77
Pu2.23	134.375
MIB.84	120.482
Cvi.0	141.703
CS28201	129.25
PHW.34	155.574
TOU.E.11	87.7912
PAR.3	116.788
CS28454	118.066
CS28550	111.338
CS28822	95.6439
CS28236	121.304
UKSE06.414	142.183
ALL1.3	89.1363
CS28685	119.965
CS28750	101.914
CS28214	119.667
CS28017	113.422
UKSE06.482	116.043
CS28513	122.888
JEA	113.625
CS28786	122.226
Pent.1	144.831
TOU.A1.43	116.991
B.1.2	134.376
CS28133	91.7779
CUR.3	97.6526
CS28812	170.619
CS28407	127.667
Fab.2	41.1502
Per.1	93.3903
Lip.0	105.723
CLE.6	136.922
CS28344	134.785
Ste.3	79.3123
Wei.0	112.515
CAM.16	131.182
CS28780	174.834
MNF.Jac.32	132.483
Sparta.1	111.806
DraII.1	152.642
St.0	116.791
Lc.0	145.956
LAC.5	130.743
CS28628	113.191
CS28369	131.236
Fj..1.5	130.279
CS28564	173.313
Lp2.6	135.171
Col.0	131.919
CS28631	143.735
Gul1.2	114.546
CS28613	196.65
CS28637	155.066
Kin.0	126.37
CS28635	119.672
L.v.5	131.857
CS28610	114.973
CS28724	126.352
CS28373	123.346
Lill..1	119.522
CS28580	182.685
BUI	124.36
CS28165	136.373
CS28492	109.481
CS28760	161.409
An.1	120.933
CS28640	129.118
LI.OF.095	124.242
CS28423	113.09
CS28490	84.5386
CS28345	135.538
CS28809	128.894
LDV.58	128.703
CS28336	147.532
CS28277	122.562
CS28013	110.137
CAM.61	106.002
CS28217	129.18
CS28268	133.569
CS28575	119.968
CS28181	94.1772
UduI.1.34	113.407
LAC.3	144.19
Petergof	116.847
Rev.2	70.4357
Map.42	139.34
TDr.3	130.812
CS28063	107.354
X11PNA4.101	131.391
T1060	80.0255
CS28645	78.6022
TOU.A1.62	105.867
CS28097	137.658
CS28743	126.422
CS28457	97.1007
Rsch.4	116.166
LDV.34	139.835
CS28208	117.26
UKSE06.278	104.463
UKSE06.062	168.248
PAR.4	109.09
Eden.2	105.509
CS28595	131.343
Fei.0	111.287
K.ln	140.734
CS28573	113.447
CS28833	105.762
Hovdala.2	123.844
Se.0	99.6624
CS28849	196.764
CS28650	170.285
Kulturen.1	151.505
Ts.1	119.949
Sq.8	90.2419
Lm.2	108.149
CS28193	129.053
Sap.0	155.247
T510	107.076
Tottarp.2	111.551
CS28578	130.075
CS28510	100.555
CS28847	103.799
CS28210	140.56
Mr.0	172.649
C24	130.592
LDV.25	147.145
Can.0	127.748
VOU.1	130.18
MIB.28	137.88
UKSE06.628	117.828
CS28090	119.309
CS28054	127.699
CS28800	173.932
VOU.2	126.671
CS28614	159.231
Cen.0	125.599
TOU.H.12	104.631
TOU.A1.12	115.943
Hov4.1	146.248
Wil.1	140.342
ZdrI.2.25	178.385
UKSE06.272	163.917
Ull3.4	109.57
UKSE06.192	165.121
CS28788	98.088
MNF.Pot.48	161.115
Hod	151.593
Fj..1.2	120.604
TOU.K.3	103.209
T1040	98.2876
X11ME1.32	144.732
Sav.0	119.913
UKNW06.460	139.165
UKSE06.520	116.557
CS28053	124.24
CS28729	126.434
CS28779	148.742
Uod.7	205.202
CS28651	121.458
Gr.1	128.839
KBS.Mac.8	120.364
MIB.15	156.276
ROM.1	121.283
X627ME.4Y1	138.326
Yo.0	134.808
CS28282	154.931
Lis.2	112.759
T540	140.249
DraIV.1.7	125.52
UKSW06.202	160.761
CS28759	118.242
Ga.0	122.279
CS28128	111.052
Mz.0	114.678
CS28007	109.324
CS28720	123.38
TOU.C.3	111.288
Paw.3	118.159
UKID101	122.935
TOU.I.17	147.875
X.r.1	102.38
CS28135	115.643
T690	108.196
Gy.0	112.921
TDr.8	90.769
CS28787	90.2669
Ull2.5	181.231
SLSP.30	108.911
CS28808	85.1285
RRS.10	144.454
Pna.17	158.677
Rmx.A180	113.162
TOU.A1.115	125.308
Sei.0	105.732
NC.6	201.48
Fj.1.1	136.781
Ost.0	128.493
UKID80	112.756
Lisse	95.8692
UKID22	134.857
CS28725	238.503
Ler.1	113.374
HR.5	97.2516
CS28527	128.851
Van.0	115.71
Wt.5	105.29
NFA.8	129.268
Sanna.2	99.9818
Ka.0	131.606
Ag.0	122.206
CS28622	177.896
NFA.10	121.177
T1110	99.4452
Tamm.2	122.182
Alc.0	119.961
CS28018	128.771
UKNW06.436	122.008
UKSE06.466	148.217
V.r2.1	125.389
UKNW06.060	107.638
T1080	127.976
TDr.18	113.822
DraIV.1.14	135.402
UKSE06.429	112.398
CS28713	125.672
MIB.22	144.098
UKID48	142.057
CS28241	92.9131
UKNW06.059	100.062
CS28692	125.101
Ge.0	120.186
phya	170.513
Pa.1	162.15
