# Supplementary material for: AtHMA4 Drives Natural Variation in Leaf Zn Concentration of Arabidopsis thaliana
Source: Front Plant Sci. 2018 Mar 1;9:270. doi: 10.3389/fpls.2018.00270 (PMC5839161; doi:10.3389/fpls.2018.00270)
Supplement: TABLE S3 — The Zn contents of VanC RILs. [file Table_3.xlsx]

## Sheet: Table S3-The Zn content of RILs
Lines	Leaf Zn Content (mg kg-1 dry weight)
Col-0	100.184
Van-0	81.2398
VanC109	100.921
VanC117	83.449
VanC12	72.7346
VanC123	73.8805
VanC132	71.6305
VanC15	97.9186
VanC152	120.206
VanC161	104.722
VanC167	88.242
VanC178	111.026
VanC184	91.1542
VanC190	72.1899
VanC196	79.6464
VanC204	98.6752
VanC218	99.5664
VanC225	85.4129
VanC228	89.2134
VanC229	104.505
VanC23	101.132
VanC26	89.754
VanC262	72.6651
VanC275	89.0673
VanC281	82.4923
VanC282	102.243
VanC286	93.6585
VanC30	90.8819
VanC312	68.1506
VanC315	107.09
VanC32	75.9335
VanC321	71.9749
VanC323	123.666
VanC325	80.1913
VanC348	90.2961
VanC36	86.0483
VanC364	83.4157
VanC371	88.3485
VanC377	93.4669
VanC378	90.535
VanC399	63.0948
VanC4	65.1846
VanC400	68.472
VanC411	70.7413
VanC417	86.3726
VanC430	108.611
VanC436	82.252
VanC449	84.5927
VanC45	81.9456
VanC461	87.2037
VanC465	88.6106
VanC48	85.9577
VanC489	69.8866
VanC495	88.4542
VanC505	70.5126
VanC507	97.5453
VanC508	80.2903
VanC523	86.7883
VanC527	83.4266
VanC535	90.0073
VanC539	83.07
VanC573	81.37
VanC585	81.0202
VanC597	83.4321
VanC598	79.7905
VanC609	103.909
VanC611	87.9874
VanC615	65.3662
VanC620	70.3373
VanC632	77.1938
VanC641	70.0202
VanC665	87.6312
VanC668	111.631
VanC678	84.7369
VanC681	66.0186
VanC69	77.5828
VanC7	87.5421
VanC701	83.0981
VanC705	85.9829
VanC707	77.5934
VanC719	99.3939
VanC728	96.0141
VanC729	72.1324
VanC73	75.237
VanC733	112.705
VanC743	89.6653
VanC747	99.5825
VanC759	105.617
VanC763	109.53
VanC766	72.8641
VanC85	72.5276
VanC9	93.6303
VanC95	77.3949
