# Supplementary material for: AtHMA4 Drives Natural Variation in Leaf Zn Concentration of Arabidopsis thaliana
Source: Front Plant Sci. 2018 Mar 1;9:270. doi: 10.3389/fpls.2018.00270 (PMC5839161; doi:10.3389/fpls.2018.00270)
Supplement: TABLE S4 — Variations of HMA4 of Fab-2 and Van-0 compared to Col-0. [file Table_4.XLSX]

## Sheet: Sheet1
Position to ATG of HMA4	Col-0	Fab-2	Van-0	Region affected
-2525	T	T	A	Promoter
-2510	A	A	G	Promoter
-2481	T	T	AC	Promoter
-2475	C	C	T	Promoter
-2450	A	A	T	Promoter
-2377	T	T	A	Promoter
-2322	AA	AA	TTT	Promoter
-2304	C	C	T	Promoter
-2297	T	C	T	Promoter
-2086 to -2074	CAAGAGTTTTGCT(13bp)	CAAGAGTTTTGCT(13bp)	TAATACTGATTAATACTGGAGTGACATTAGCAGGCTCACTAACCATCAAGAGTTTTCCA(59bp)	Promoter
-1621	-	-	T	Promoter
-1493	T	T	G	Promoter
-1034	A	A	G	Promoter
-946	C	C	T	Promoter
-942	A	A	T	Promoter
-594	T	T	C	5'-UTR
-292	A	A	G	intron
-261	A	A	C	intron
229	-	-	T	intron
252-253	TT	AA	TT	intron
254 to 257	AAAA	AAAA	TAGTTTTGTTTT	intron
885	-	-	A	intron
944	GTT	GTT	A	intron
1002	C	C	A	intron
1325	T	A	T	intron
1593	T	- (caused a frame shift and early termination)	T	exon
1609	GTG(valine)	G	GTC(valine)	exon
1720	T	T	G	intron
2088	G	A	G	intron
2561	G	C	G	intron
2590	T	A	T	intron
3026	--	--	TT	intron
3634	ACC(threonine)	C	ACG(threonine)	exon
3646	GGA(glycine)	A	GGC(glycine)	exon
3652	ATT(phenylalanine)	T	ATC(phenylalanine)	exon
3727	G	A	A	intron
3738	T	T	C	intron
3792	TGT(cysteine)	T	TGC(cysteine)	exon
5673	AGG(arginine)	G	AAG(lysine)	exon
